# Supplementary material
Source: PubMed Central journal article supplement (PMC6932242)
Supplement: JB.00425-19-s0001.pdf [file JB.00425-19-s0001.pdf]

## **Supplemental Material**

### **Double tubular contractile structure of the type VI secretion system displays striking flexibility and elasticity**

**Maria Silvina Stietz, Xiaoye Liang, Megan Wong, Steven Hersch, Tao G. Dong**

**Table S1.** Strains.

**Table S2.** Plasmids.

**Table S3.** Primers.

**FIG S1.** Deformation of the T6SS sheath in spheroplasts.

**FIG S2.** Contraction events of curved sheaths.

**FIG S3.** Elasticity of curved sheaths.

**FIG S4.** Evaluation of curved sheaths in rod cells.

**FIG S5.** Disassembly of curved sheaths by ClpV.

**Supplemental movie legends.**

**Table S1**

| <b>Organism-strain</b>                               | <b>Genotype</b>                                                                                                                                             | <b>Description</b>                                                                                                        | <b>Reference</b>    |
|------------------------------------------------------|-------------------------------------------------------------------------------------------------------------------------------------------------------------|---------------------------------------------------------------------------------------------------------------------------|---------------------|
| <i>V. cholerae</i> -V52                              | Wilde-type, Str <sup>r</sup>                                                                                                                                | Serotype 37 clinical isolated from Sudan. Parental strain.                                                                | (1)                 |
|                                                      | $\Delta vasK$ ( <i>tssM</i> ), Str <sup>r</sup>                                                                                                             | T6SS negative mutant, deletion of VCA0120 gene.                                                                           | (1)                 |
|                                                      | <i>vipA</i> -sfGFP, Str <sup>r</sup>                                                                                                                        | C-terminal chromosomal fusion of sfGFP to <i>vipA</i> .                                                                   | (2)                 |
|                                                      | <i>vipA</i> -mCherry2, Str <sup>r</sup>                                                                                                                     | C-terminal chromosomal fusion of mCherry2 to <i>vipA</i> .                                                                | (2)                 |
|                                                      | <i>clpV</i> -sfGFP, Str <sup>r</sup>                                                                                                                        | C-terminal chromosomal fusion of sfGFP to <i>clpV</i> .                                                                   | (2)                 |
|                                                      | <i>vipA</i> -mCherry2, <i>clpV</i> -sfGFP, Str <sup>r</sup>                                                                                                 | C-terminal chromosomal fusions of mCherry2 to <i>vipA</i> and sfGFP to <i>clpV</i> .                                      | (2)                 |
|                                                      | $\Delta mrcA$ , Str <sup>r</sup>                                                                                                                            | Chromosomal deletion of VC2635 to induce spheroplasts.                                                                    | This study          |
|                                                      | <i>vipA</i> -sfGFP, $\Delta mrcA$ , Str <sup>r</sup>                                                                                                        | Chromosomal deletion of VC2635 in <i>VipA</i> -sfGFP background.                                                          | This study          |
|                                                      | <i>vipA</i> -N3-sfGFP, Str <sup>r</sup>                                                                                                                     | Chromosomal <i>VipA</i> -sfGFP fusion with 3 amino acids (codons 26-28) duplicated. Non-contractile sheaths.              | This study          |
|                                                      | $\Delta vipB$ , Str <sup>r</sup>                                                                                                                            | Chromosomal deletion of VC0108. Negative control donor strain for delivery assay.                                         | (3)                 |
|                                                      | $\Delta hcp1/2$ , <i>vipA</i> -sfGFP, Str <sup>r</sup>                                                                                                      | Chromosomal deletion of VC1415 and VCA0017 in <i>VipA</i> -sfGFP background. Recipient strain for delivery assay.         | (4)                 |
|                                                      | $\Delta vgrG2$ , <i>vipA</i> -sfGFP, Str <sup>r</sup>                                                                                                       | Chromosomal deletion of VCA0018 in <i>VipA</i> -sfGFP background. Recipient strain for delivery assay.                    | (4)                 |
|                                                      | $\Delta hcp1/2$ , <i>vipA</i> -mCherry2, Str <sup>r</sup>                                                                                                   | Chromosomal deletion of VC1415 and VCA0017 in <i>VipA</i> -mCherry2 background. Negative control for PAO1 reporter assay. | (4)                 |
|                                                      | $\Delta tagA$                                                                                                                                               | Chromosomal deletion of VCA0121.                                                                                          | (3)                 |
| $\Delta tagA$ , <i>vipA</i> -sfGFP, Str <sup>r</sup> | Chromosomal deletion of VCA0121 in <i>VipA</i> -sfGFP background.                                                                                           | This study                                                                                                                |                     |
| <i>P. aeruginosa</i> -PAO1                           | <i>tssB</i> -sfGFP, Irg <sup>r</sup>                                                                                                                        | C-terminal chromosomal fusion of sfGFP to PA0083. Reporter strain for functionality assay.                                | This study          |
| <i>E. coli</i> -DH5 $\alpha$ $\lambda$ pir           | F <sup>-</sup> , endA1, glnV44, thi-1, recA1, relA1, gyrA96 deoR, nupG, $\Phi$ 80dlacZ $\Delta$ M15, ( <i>lacZYA</i> -argF)U169, hsdR17(rKmK+), $\lambda$ - | Strain used for cloning                                                                                                   | New England Biolabs |
| <i>E. coli</i> -SM10 $\lambda$ pir                   | Km <sup>r</sup> , thi-1, thr, leu, tonA, lacY, supE, recA::RP4-2- Tc::Mu, pir                                                                               | Strain used for conjugation                                                                                               | John Mekalanos lab  |
| <i>E. coli</i> MG1655                                | Gen <sup>r</sup>                                                                                                                                            | Random transposon mutant strain. Prey used for T6SS killing                                                               | John Mekalanos lab  |

Note: Str, Streptomycin; Irg, Irgasan; Gen, Gentamycin; r, Resistance.

**Table S2.**

| Plasmid                               | Description                                                                                | Source             |
|---------------------------------------|--------------------------------------------------------------------------------------------|--------------------|
| pDS132, Cm <sup>r</sup>               | Suicidal conjugation backbone vector for making in-frame deletions in <i>V. cholerae</i>   | John Mekalanos lab |
| pDS132-vipA-mCherry2                  | Suicidal vector to create chromosomal insertion VipAmCherry2 in strain V52                 | This study         |
| pDS132-vipA-sfGFP                     | Suicidal vector to create chromosomal insertion VipAmsfGFP in strain V52                   | This study         |
| pDS132-N3-vipA-sfGFP                  | Suicidal vector to create chromosomal VipA-N3-sfGFP                                        | This study         |
| pBAD18, Km <sup>r</sup>               | Arabinose-inducible expression backbone vector, conferring kanamycin resistance            | John Mekalanos lab |
| pBAD18- <i>tagA</i> , Km <sup>r</sup> | Arabinose inducible expression of VCA0121                                                  | This study         |
| pEXG2.0, Gen <sup>r</sup>             | Suicidal conjugation backbone vector for making in-frame deletions in <i>P. aeruginosa</i> | John Mekalanos lab |
| pEXG2.0-PA0083-sfGFP                  | Suicidal vector to create chromosomal insertion of <i>tssB</i> -sfGFP in strain PAO1       | This study         |

Note: Str, Streptomycin; Irg, Irgasan; Cm, Chloramphenicol; Km, Kanamycin; Gen, Gentamycin. R, Resistance.

**Table S3**

| Primer name                | Sequence (5' to 3')                                 | Description                                                 |
|----------------------------|-----------------------------------------------------|-------------------------------------------------------------|
| VCA2635-ko1-XbaI*          | GATAT <b>CTAG</b> AAAAGCGCGTCCTCTAAACCA             | To create deletion mutant of <i>mrcA</i> V52                |
| VCA2635-ko2                | GTTTACTAGAACAGCTCTTCTAGTTGAGGCTGCACTAATG            | To create deletion mutant of <i>mrcA</i> V52                |
| VCA2635-ko3                | CATTAGTGCAGCCTCAACTAGAAGAGCTGTTCTAGTAAAC            | To create deletion mutant of <i>mrcA</i> V52                |
| VCA2635-ko4-XbaI*          | GATAT <b>CTAG</b> ATTTGTCAGCCAACCCACCTT             | To create deletion mutant of <i>mrcA</i> V52                |
| VCA2635-ko5                | AGGCAGTGACAAGCGTTGAT                                | To confirm deletion mutant of <i>mrcA</i> V52               |
| VCA2635-ko6                | GCAGAAGCGTGCTTTGTCAG                                | To confirm deletion mutant of <i>mrcA</i> V52               |
| VipA-N3-F**                | CAGGCTGAGGTTGCTGAGGTTGAGCTACCACTCAAACCC             | For inserting N3 (AEV) after codon 25 of VipA V52           |
| VipA-N3-R**                | TCAACCTCAGCAACCTCAGCCTGTGCATCCCCCGTCGCCG            | For inserting N3 (AEV) after codon 25 of VipA V52           |
| pBAD- <i>tagA</i> -F-NheI* | ATAG <b>CTAG</b> CAGGAGGAAACGATGTCCAATGTGATTTTTATTG | For cloning <i>tagA</i> (VCA0121) into pBAD18               |
| pBAD- <i>tagA</i> -R-XbaI* | TCAGT <b>CTAG</b> ATCACTGCAACAAAGCCGCAT             | For cloning <i>tagA</i> (VCA0121) into pBAD18               |
| PA0083-sfGFP-1-XbaI*       | GAGAT <b>CTAG</b> AAGTACTGGGACGGCGTCTAT             | To create chromosomal sfGFP insertion into <i>tssB</i> PAO1 |
| PA0083-sfGFP-2             | TCCTCCTCCTGCGGCCGCGGCCGCTGCGGCTCGTCGTCT             | To create chromosomal sfGFP insertion into <i>tssB</i> PAO1 |
| PA0083-sfGFP-3             | AGACGACGAGCCGCAGGCCGCGGCCGCGCAGGAGGAGGA             | To create chromosomal sfGFP insertion into <i>tssB</i> PAO1 |
| PA0083-sfGFP-4             | TCGGCCATGCTGGAATCCTCTTATTTGTAGAGCTCATCCA            | To create chromosomal sfGFP insertion into <i>tssB</i> PAO1 |
| PA0083-sfGFP-5             | TGGATGAGCTCTACAAATAA GAGGATTCCAGCATGGCCGA           | To create chromosomal sfGFP insertion into <i>tssB</i> PAO1 |
| PA0083-sfGFP-6-XbaI*       | GAGAT <b>CTAG</b> ACACCAGCCGTAGAGCTTGAA             | To create chromosomal sfGFP insertion into <i>tssB</i> PAO1 |

Note: \*letter in bold indicate enzyme restriction site, \*\* Gibson assembly cloning

## Supplemental figures.

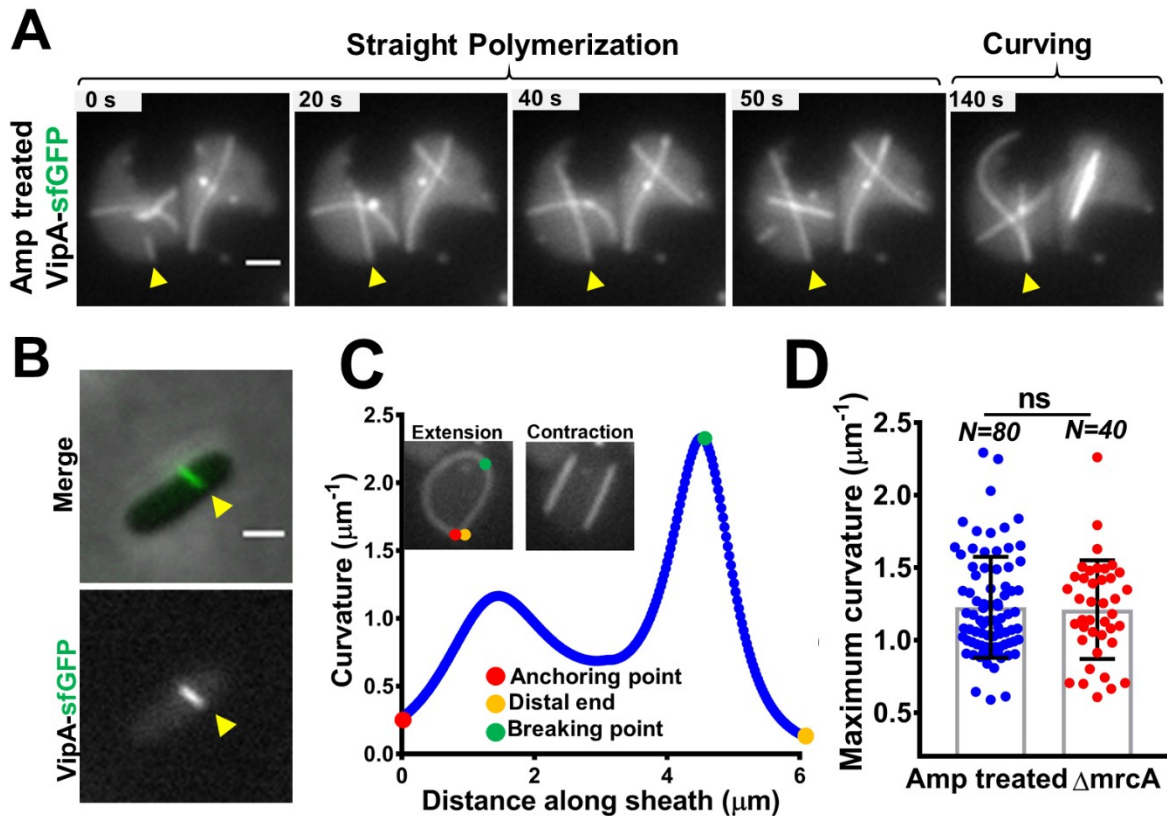

**FIG S1. Deformation of the T6SS sheath in spheroplasts.** **A.** An examples of curved sheath polymerization guided by contact with cell membrane. Image sequence corresponds to VipA-sfGFP labeled ampicillin treated cell. The GFP (green) fluorescence channel is shown in grayscale. Yellow arrows indicate anchoring point. Full video is 5 min time-lapse, 10 sec per frame. Scale bar, 1  $\mu\text{m}$ . **B.** Fully extended sheath in rod cell. Top image is a merge of phase and GFP (green) channel. Bottom image is GFP only in grayscale. Scale bar, 1  $\mu\text{m}$ . Yellow arrowhead indicates extended sheath. **C.** Sheath curvature ( $y$ , axes) was measured at each point along the sheath ( $x$ , axes) in VipA-sfGFP labeled spheroplasts. 3 x 3  $\mu\text{m}$  insets show the extended and contracted state of the sheath at the top left. The sheath anchoring, distal end and breaking point are shown in red, yellow and green dots, respectively. **D.** The curvature at each point along the sheath was measured for curved sheaths formed in ampicillin treated (Mean=1.22  $\mu\text{m}^{-1} \pm 0.34$ ; N=80, blue dots) and *mrcA* deletion (Mean=1.21  $\mu\text{m}^{-1} \pm 0.33$ ; N=40, red dots) cells using Kappa, as shown in panel C. The maximum value, Maximum Curvature ( $\mu\text{m}^{-1}$ ), for each sheath is plotted. Each data point represents a sheath,  $N$  indicates number of analysed sheaths. Significance was calculated using a two-tailed Student's  $t$ -test. ns, non-significant. Measurements were taken from at least three biological replicates.

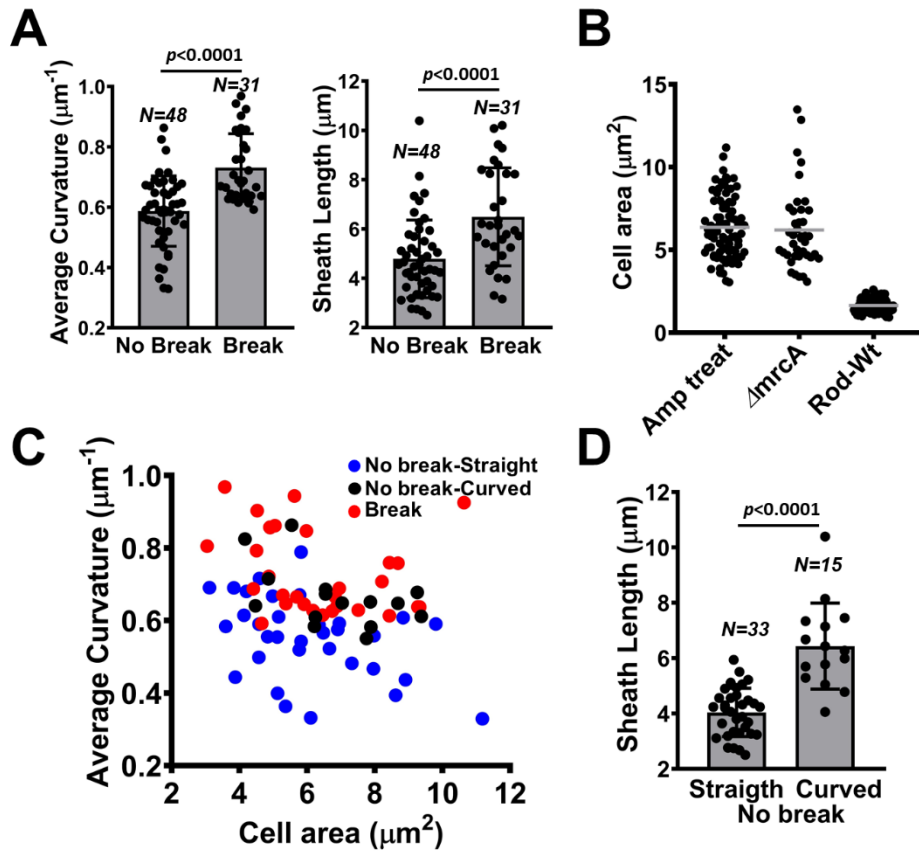

**FIG S2. Contraction events of curved sheaths.** **A.** Average curvature ( $\mu\text{m}^{-1}$ ) and curve length ( $\mu\text{m}$ ) of the extended sheaths and their *no break* and *break* contraction events are plotted. **B.** Cell area ( $\mu\text{m}^2$ ) measured for VipAsfGFP labeled ampicillin treated and *mrcA* spheroplasts and for rod cells. Each data point represents a cell. Mean value is indicated by gray line. **C.** Scatter plot shows the dispersion of the cell area ( $\mu\text{m}^2$ ) and the average curvature ( $\mu\text{m}^{-1}$ ) ( $x$ ,  $y$ ) for extended sheaths that showed: normal contraction straightened (*No break-Straight*, blue dots,  $N=33$ ), normal contraction slightly curved (*No break-Curved*, black dots,  $N=15$ ) and sheaths that break into pieces after contraction (*Break*, red dots,  $N=31$ ). Each data point represents a sheath. **D.** Curve length ( $\mu\text{m}$ ) of contracted sheaths that straighten or remain slightly curved after contraction. In all graphs, scatter plots show mean value in gray bars $\pm$ SD (black lines). Significance was calculated using a two-tailed Student's *t*-test: *p* values are indicated in the graph. Measurements were taken from at least three biological replicates.

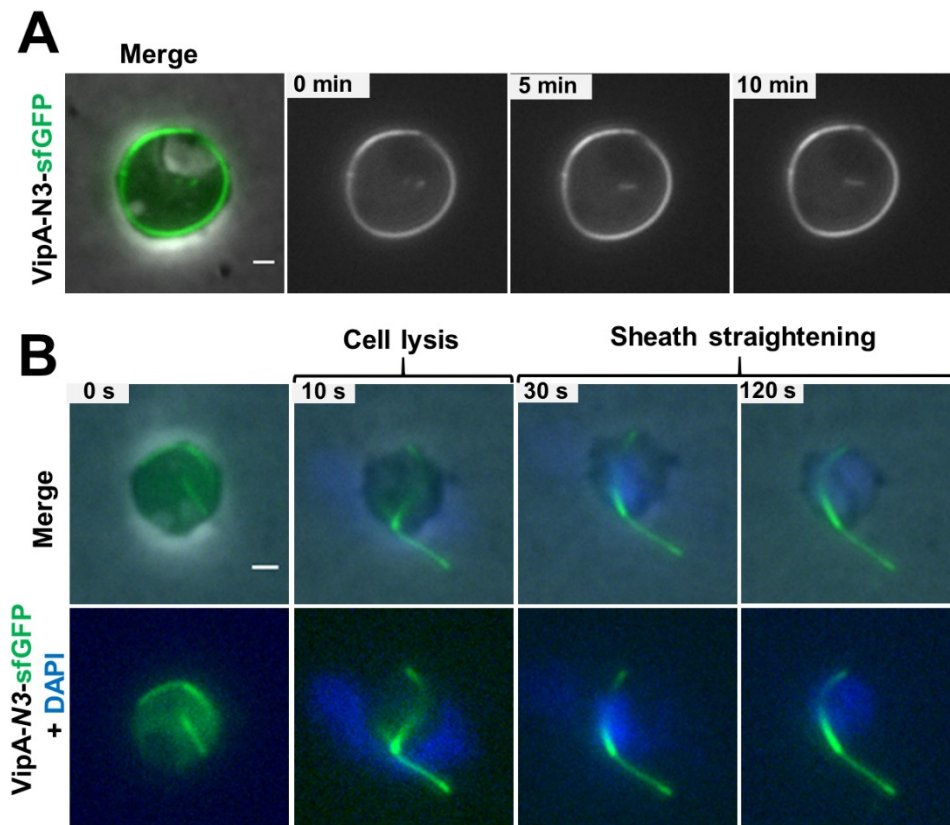

**FIG S3. Elasticity of curved sheaths.** Related to Fig. 2. **A.** Image sequence shows non-contractile curved sheath assembled in the VipA-N3-sfGFP ampicillin treated strain. Image on the left is a merge of phase and green (GFP) channels. **B.** Additional example of straightening after cell lysis (related to Fig. 2C) induced by 80  $\mu\text{g}/\text{mL}$  colistin-0.1% triton X-100. Top row, merge of phase, green (VipA-sfGFP) and blue (DAPI) channels. Bottom row, green and blue channels only. Original video is 8 min time-lapse, frame rate 10 sec per frame. Full video is included in Movie S3, cell 2. All scale bars, 1  $\mu\text{m}$ .

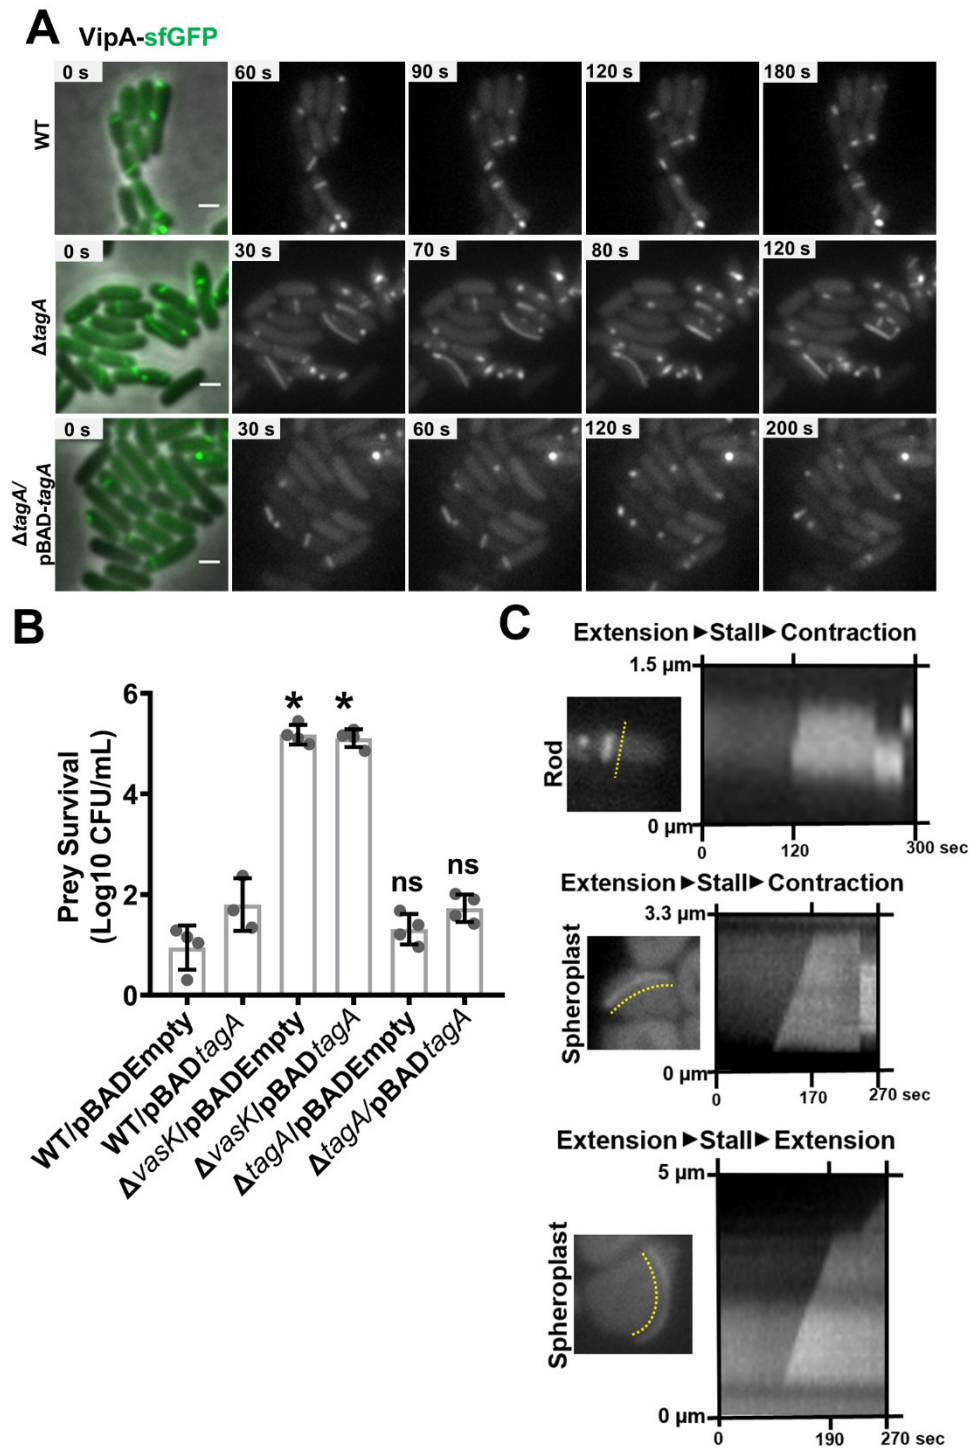

**FIG S4. Evaluation of curved sheaths in rod cells.** Related to Fig. 3. **A.** Image sequence of rod shaped-VipA-sfGFP wild type (WT), *tagA* deletion ( $\Delta tagA$ ), and the corresponding complemented strain ( $\Delta tagA/pBAD-tagA$ ) induced with 0.01% L-arabinose. The left image is a merge of the phase and GFP (green) channels in all rows. Image series correspond to a 5 min time-lapse, 10 sec per frame. Scale bars, 1  $\mu$ m. **B.** Quantification of prey survival (*E. coli* MG1655) after 3 h co-incubation with killer cells: wild type (WT), T6SS negative control ( $\Delta vasK$ ), or TagA deletion ( $\Delta tagA$ ) carrying pBAD empty plasmid as

control or the expression plasmid pBAD-*tagA*. Scatter plots show mean value in gray bars±SD (black lines). Each data point represents an independent biological replicate. Significance was calculated using a two-tailed Student's *t*-test: (\*)  $p < 0.05$ ; ns, not significant, when compared to prey cell counts after co-incubation with the wild type strain (WT) carrying the same plasmid. C. Kymographs correspond to the area of the sheath indicated by yellow dash lines. 5 min time-lapse videos of 5.5 sec (for spheroplasts) and 10 sec (for rod) interval per frame were used to build the kymographs. Top and middle images show examples of sheath stall stage before contraction in, spheroplast (=70 sec) and rod (= 90 sec) cells. Bottom image shows example of sheath stall stage (= 45 sec) in spheroplast before re-starting polymerization.



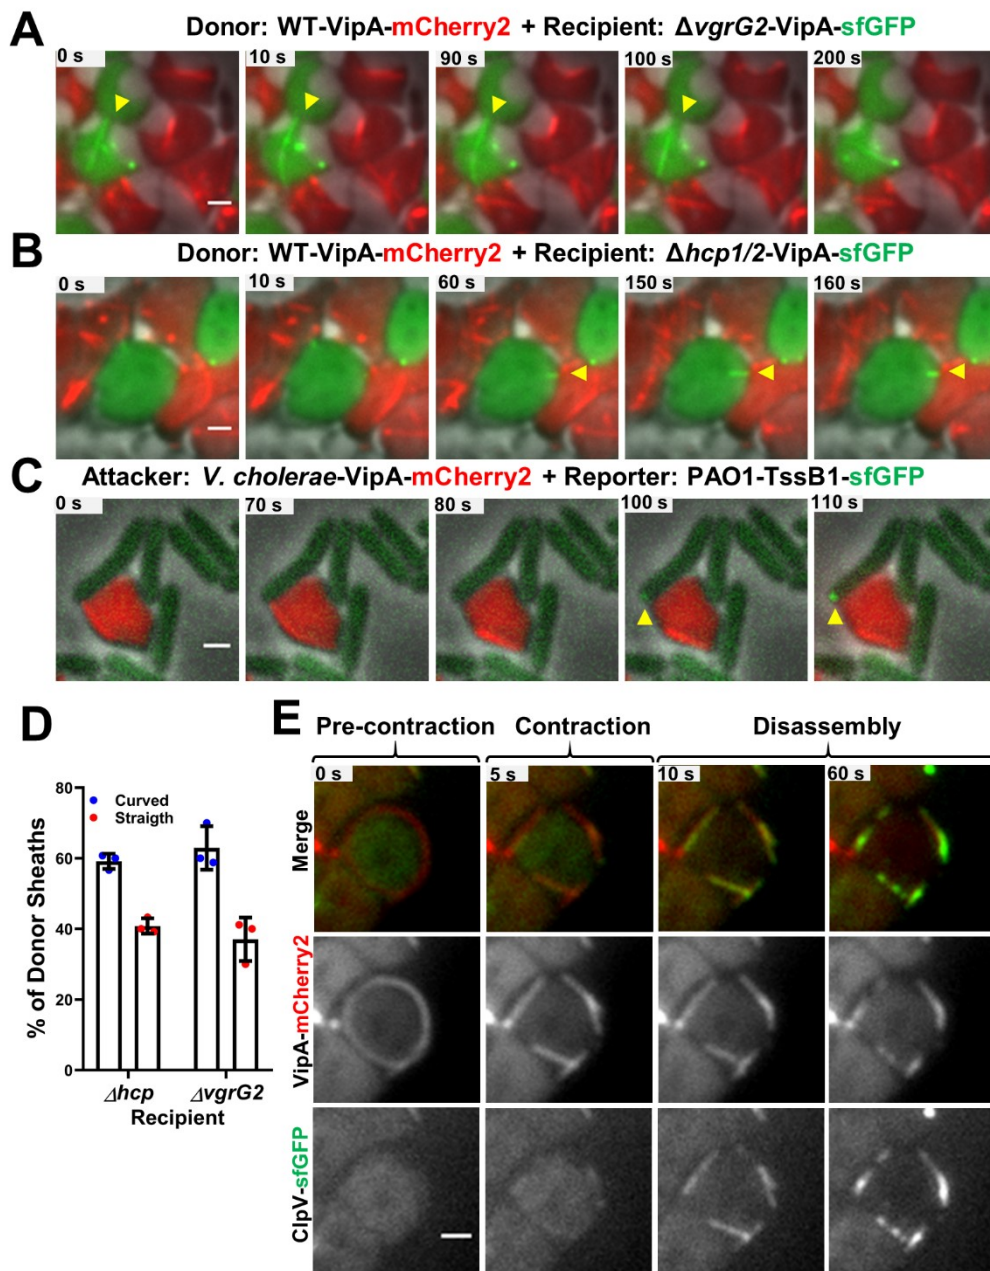

**FIG S5. Disassembly of curved sheaths by ClpV.** Related to Fig. 4. Image sequences show representative examples of sheath formation in the recipient cells,  $\Delta vgrG2$ -VipA-sfGFP (**A**) and  $\Delta hcp1/2$ -VipA-sfGFP (**B**) co-incubated with the donor strain T6SS+ VipA-mCherry2. Both recipient and donor cells were treated with 500  $\mu$ g/mL ampicillin for 45 min, mixed at a 3:1 ratio (donor to recipient) and incubated onto an agarose pad for 3 h before imaging. Each image is a merge of phase, mCherry2 (red) and GFP (green) channels. Sheath formation in the recipient cell is indicated by yellow arrows. **C.** A representative example of a focus formed (yellow arrows at 100 and 110 sec time points) in the reporter strain *P. aeruginosa* PAO1-TssB-sfGFP after sheath contraction in the attacker cell, *V. cholerae* T6SS+ VipA-mCherry2, is shown. All scale bars, 1  $\mu$ m. **D.** Bar graph shows the percentage of curved and straight sheaths assembled in the donor strain T6SS+ VipA-mCherry2 surrounding  $\Delta vgrG2$  or  $\Delta hcp1/2$ -

VipA-sfGFP recipient cells. **E.** Additional example of a curved circular sheath assembled in a double labeled VipA-mCherry2; ClpV-sfGFP ampicillin treated cell. Pre-contraction, contraction and disassembly by ClpV are shown. Top row corresponds to a merge of mCherry2 (red) and GFP (green) fluorescence channels. Middle and bottom rows show VipA-mCherry2 and ClpV-sfGFP signal only, respectively in grayscale. 5 minutes time-lapse, frame rate of 5.5 sec per frame. All scale bars, 1  $\mu\text{m}$ .

### **Supplemental Movie legends.**

**Movie S1. Curved sheath formation in *V. cholerae* spheroplasts.** Related to Fig. 1 and Fig. S1. VipA-sfGFP labelled cells were treated with 500  $\mu\text{g}/\text{mL}$  ampicillin for 45 min and incubated on agarose pad before imaging. Two representative fields of view (FOV) of 40 x 40  $\mu\text{m}$  acquired during 15 min time-lapse with a 10 sec frame rate are shown. Video plays at a rate of 10 frames per second. Left field shows a merge between phase (pseudo-colored as blue) and GFP fluorescence channels; right field shows only GFP fluorescence channel in grayscale.

**Movie S2. Non-contractile VipA-N3 curved sheaths.** Related to Fig. S3A. The VipA-N3-sfGFP strain was treated with ampicillin for 45 min to induce spheroplast formation. Cells were imaged after 3 h incubation on agarose pad. Three representative videos acquired during 10 min time-lapse with a 10 sec frame rate are shown. Field of view (FOV) is 40 x 40  $\mu\text{m}$ . Video plays at a rate of 10 frames per second. Left field shows a merge between phase and GFP fluorescence channels; right field shows only GFP fluorescence channel in grayscale.

**Movie S3. Cell lysis and sheath straightening.** Related to Fig. 2C and Fig. S3B. The VipA-N3-sfGFP strain was treated with ampicillin and incubated on agarose pad for 3 h. Cell lysis was induced by addition of 80  $\mu\text{g}/\text{mL}$  colistin-0.1% Triton X to the agarose pad. To stain nucleic acid, 10  $\mu\text{g}/\text{mL}$  DAPI were added. Two representative cell lysis events are shown. Field of view is 10 x 10  $\mu\text{m}$ . Image series were taken during 8 min time-lapse at a 10 sec frame rate. Video plays at a rate of 10 frames per second. Left field shows a merge of phase, GFP (green) and DAPI (blue) fluorescence channels. On the right panel, a merge of only GFP and DAPI fluorescence channels is shown.

**Movie S4. Overexpression of TagA in spheroplasts assembling curved sheaths.** Related to Fig. 3A, B and C. Wild type VipA-sfGFP labeled cells carrying plasmid pBAD-*tagA* were treated with ampicillin for curved sheath formation on an agarose pad, at this point 1  $\mu$ L of 0.05% L-arabinose (+ Ara, left panel) or PBS (- Ara, right panel) was added to the cells and immediately imaged during 20 minute time-lapse at a frame rate of 10 sec per frame. Each field of view is 30 x 30  $\mu$ m. Video plays at a rate of 10 frames per second. GFP signal is shown in gray scale. Scale bars, 5  $\mu$ m.

**Movie S5. Curved sheaths are disassembled by ClpV upon contraction.** Related to Fig. 4D and Fig. S5E. The VipA-mCherry2 ClpV-sfGFP double labeled strain was used to induce spheroplasts by ampicillin-treatment. Image series were taken after 3 h incubation on an agarose pad. Three representative fields of view (FOV) acquired during 5 min time-lapse with a 5.5 sec frame rate are shown. Field of view is 40 x 40  $\mu$ m. Video plays at a rate of 10 frames per second. Left field shows a merge of phase channel, mCherry2 (red) and GFP (green) fluorescence channels; middle field shows only mCherry2 channel in gray scale and right field shows only GFP fluorescence channel in gray scale.

## References

1. Pukatzki S, Ma AT, Sturtevant D, Krastins B, Sarracino D, Nelson WC, Heidelberg JF, Mekalanos JJ. 2006. Identification of a conserved bacterial protein secretion system in *Vibrio cholerae* using the Dictyostelium host model system. Proc Natl Acad Sci 103:1528–1533.
2. Basler M, Mekalanos JJ. 2012. Type 6 Secretion Dynamics Within and Between Bacterial Cells. Science (80- ) 337:815–815.
3. Zheng J, Ho B, Mekalanos JJ. 2011. Genetic analysis of anti-amoebae and anti-bacterial activities of the type vi secretion system in *Vibrio cholerae*. PLoS One 6.
4. Ma AT, McAuley S, Pukatzki S, Mekalanos JJ. 2009. Translocation of a *Vibrio cholerae* Type VI Secretion Effector Requires Bacterial Endocytosis by Host Cells. Cell Host Microbe 5:234–243.
